# Supplementary material for: Dysplastic gangliocytoma of the cerebellum in a cat
Source: PubMed Central journal article supplement — Vet Pathol. 2022 Feb 7;59(3):459–62. doi: 10.1177/03009858221075594 (PMC9109245; doi:10.1177/03009858221075594), 2022-02-07
Supplement: sj-pdf-1-vet-10.1177_03009858221075594.pdf [file sj-pdf-1-vet-10.1177_03009858221075594.pdf]

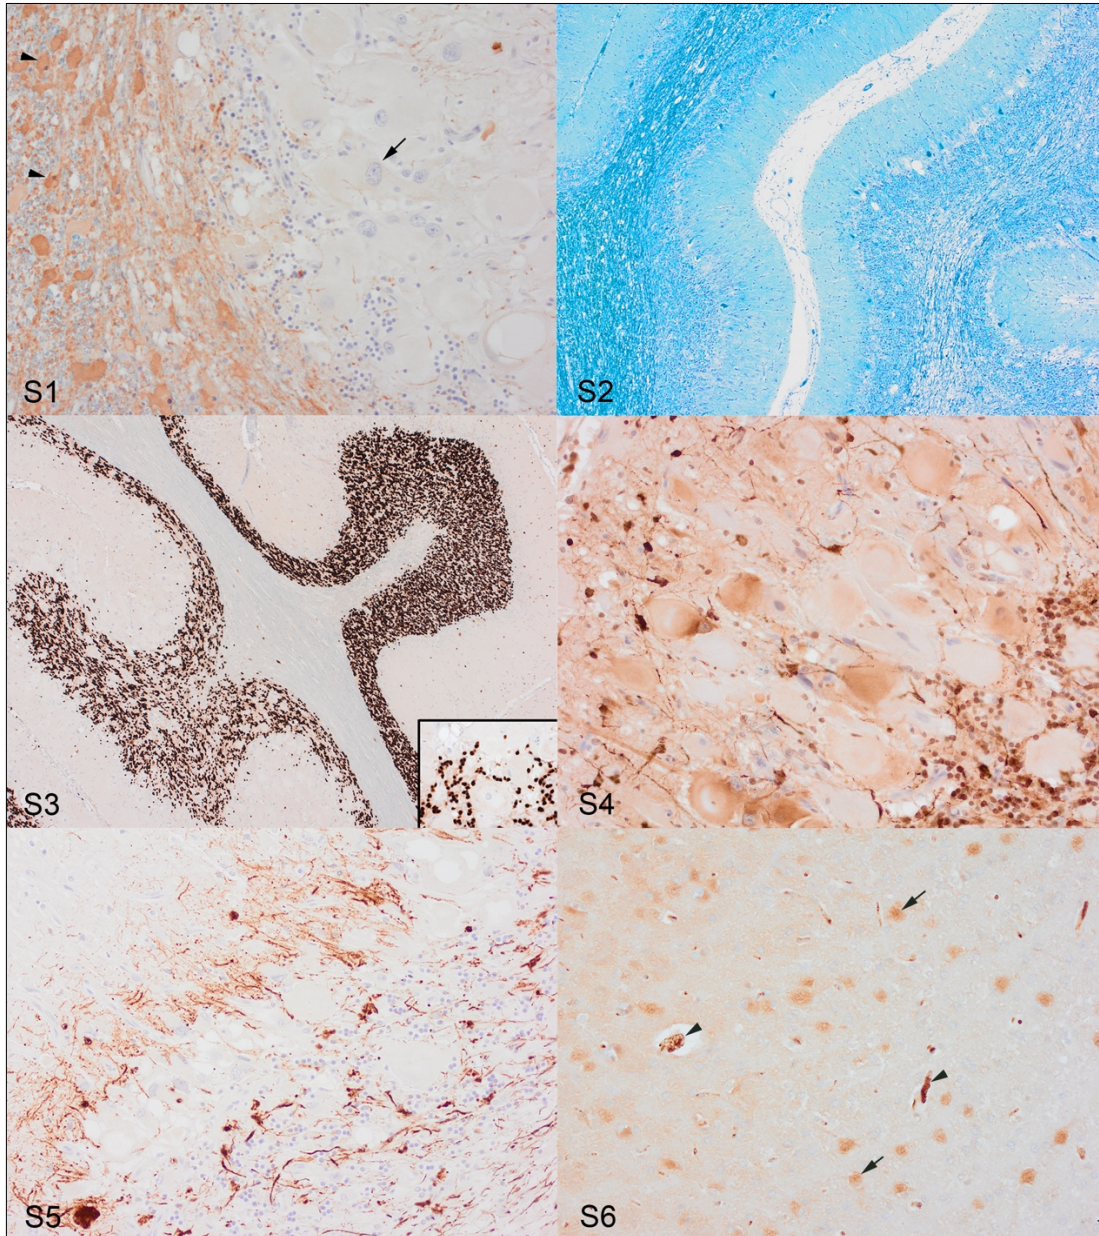

**Supplementary Fig. S1-S5.** Dysplastic gangliocytoma, cerebellum, cat.

**Supplementary Fig. S1.** The white matter (left side) is multifocally extensive rarefied and contains large numbers of gemistocytes (arrowheads) which have cytoplasmic immunolabeling for glial fibrillary acidic protein (GFAP). Neoplastic cells (arrows) are not labeled by GFAP. **Supplementary Fig. S2.** Luxol fast blue highlights marked loss of myelin in these affected areas of the molecular layer (right side). **Supplementary Fig. S3.** Neuronal nuclear antigen (NeuN) positively labels nuclei of internal granule cell neurons. Neoplastic cells displace granule layer (left side) and exhibit no labelling for NeuN. Inset: Magnification. **Supplementary Fig. S4.** Axonal immunolabeling by NF52 was maintained in the axons of dysplastic cells. **Supplementary Fig. S5.** Dysplastic cells feature axonal immunolabeling for NF312. **Supplementary Fig. S6.** Cerebrum, cat. Positive labelling by PTEN antibodies is seen in the cytoplasm and nuclei of neurons (arrows) and in endothelial cells (arrowheads).

*Veterinary Pathology: Supplemental Materials*  
Imlau et al. Dysplastic Gangliocytoma of the Cerebellum in a Cat.

**Supplemental Table S1.** Antibodies Used for Immunohistochemistry.

| <b>Antibody</b>                            | <b>Species</b> | <b>Clone</b>         | <b>Dilution/ Incubation Time</b> | <b>Antigen Retrieval</b>     |
|--------------------------------------------|----------------|----------------------|----------------------------------|------------------------------|
| GFAP (DAKO, Glostrup, Denmark)             | Rabbit         | Polyclonal           | 1:6000, 15 mins at 37°C          | EDTA buffer, pH 9.0, 20min   |
| NF-52 (Merck, Darmstadt, Germany)          | Mouse          | Monoclonal (N52)     | 1:5000, 15 mins at RT            | EDTA buffer, pH 9.0, 20min   |
| NF-312 (Abcam, Cambridge, UK)              | Mouse          | Monoclonal (SMI-312) | 1:7000, 15 mins at RT            | EDTA buffer, pH 9.0, 20min   |
| NeuN (Merck, Darmstadt, Germany)           | Mouse          | Monoclonal (A60)     | 1:1000, 15 mins at 37°C          | EDTA buffer, pH 9.0, 20min   |
| PTEN, (Cell Signaling Technology, MA, USA) | Rabbit         | Monoclonal (138G6)   | 1:100, overnight at 4°C          | Citrate buffer pH 6.1, 10min |

Abbreviations; GFAP, Glial fibrillary acidic protein; NF, Neurofilament; NeuN, neuronal nuclear protein; PTEN, Phosphatase and tensin homolog.
